# Supplementary material
Source: PubMed Central journal article supplement (PMC4792229)
Supplement: me-15-1220.pdf [file me-15-1220.pdf]

## Supplemental Figures

Figure S1. Assessment of A01 labeling in transplanted islets. (A) Quantification of labeling frequencies with A01 element from *ARX* locus in Donors 4 and 6 (data for CMV, GUTR, and GUTR2 reproduced from Figure 3 for comparison). (B) Immunostaining of A01-directed labeling in transplanted islets.

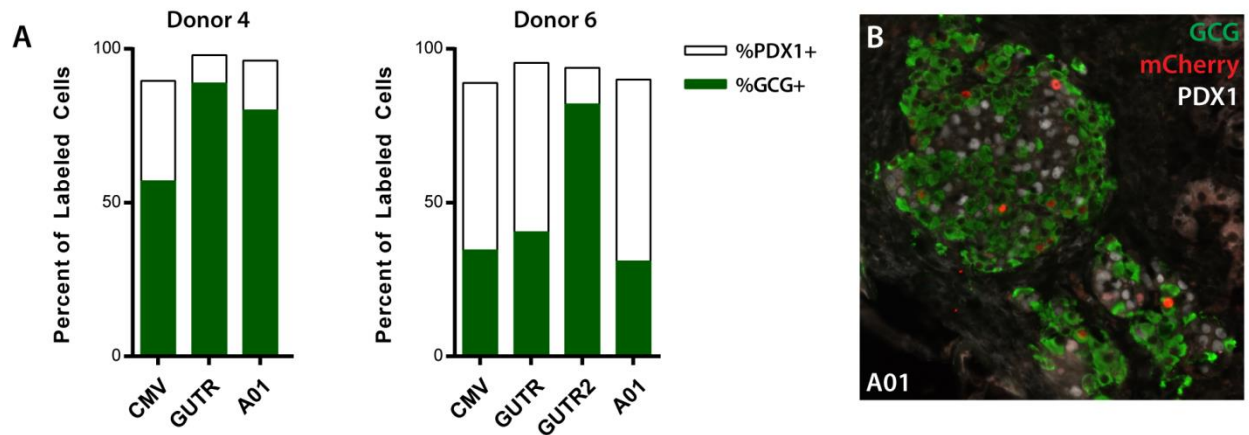

Figure S2. Labeling of  $SST^+$   $\delta$  cells by lenti-CMV-H2B:mCherry and lenti-GUTR2-H2B:mCherry constructs. Percentages refer to total  $mCherry^+$   $SST^+$  cells out of total  $mCherry^+$  cells.

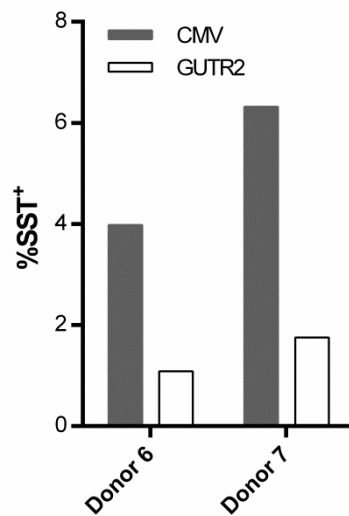

## Supplemental Tables

**Table S1. Primer sequences for amplifying conserved regions**

| Region     | Primer 1                       | Primer 2                          |
|------------|--------------------------------|-----------------------------------|
| G01        | ATAGTGACATCATGCGGTTGGTTA       | GCTGACACTTGTCTCTGCACC             |
| G02        | ATTGCTCCATCCTTTCTGCCTGAA       | GCTCTGCTGTCTGTCAGAACAC            |
| G03        | AAAAGTTCTGCCCCTAAAAATGAG       | CTGGCCTGAGAGCTATTTTTAAAGG         |
| G04        | TTAACTCTGAAGAGCCACTTAACGA      | TGAAACCCCGCCTCTACTAAAAATA         |
| G05        | AGTGGTTGATGAATACCAAGAGGAA      | GGCATTCCCATTCTAGAAAATGAGG         |
| G06        | AAATACTTCTCCACCACTCTTCTC       | TGCTGTAACAAATCACCACAACTT          |
| G07        | GGGTTCAAATTTTAGGCTGCTACTT      | AATGGCTTGGACTCTTACTTTAGGT         |
| G08        | CAGGAGGCTGCAGAAGAATTTTTAA      | AATACAAAAATTAGTTGGGCGTGGT         |
| G09        | AATAGAAACCCATACTCATCAGCA       | GTCCAGGATATTAGGCTCTTAGGTG         |
| GCG 3' UTR | CTATATCACTATTCAAGATCATCTTCACAA | TGGTAAAGAAGCTTGAAAATTTTATTTAATTGT |
| A01        | GGTTAGATAGCGGGTTATAACGGAT      | GAAGTTGGGTATTGGATTGTGACAA         |
| A02        | TCTGGCTAACCTGTCTGAAAATGTA      | GAGAAGACTGAGGGAAAAGGAGTTG         |
| A03        | TCTCTCTCTCTCTCTGGCTTTTA        | AATAGCATCCTCACTTGGGAAGATT         |
| A04        | TTGTGTAGCCAAATCTGTCTAGACA      | AGCACTCTCTCACACACAAAGATAT         |
| A05        | CTACATATAAGGTGCATAGAGGGGG      | TGTCTGAATGAAGGGGGTCTTAAAT         |
| A06        | TTGGAAACTGTTTGTGAAAGTCAA       | AAGGGAGGAGACAGAATAAAGCAAT         |
| GCG 5' UTR | GGTCTCTCACCCAATATAAGCATAGAA    | CTTCTGGTAGTGTGCTGTAGAACA          |

**Table S2. Description of candidate regions**

| Region     | Size    | Sequence Position* |
|------------|---------|--------------------|
| G01        | 1.8 kb  | -988 to +833       |
| G02        | 3.7 kb  | -473 to +3227      |
| G03        | 1.3 kb  | -15758 to -14433   |
| G04        | 1.7 kb  | -5991 to -4321     |
| G05        | 1 kb    | +5027 to +6067     |
| G06        | 1.9 kb  | +25089 to +27025   |
| G07        | 1.4 kb  | +51684 to +53111   |
| G08        | 1 kb    | +12093 to +13139   |
| G09        | 1 kb    | -7965 to -6915     |
| GCG 3' UTR | 0.5 kb  | +9041 to +9530     |
| A01        | 2.7 kb  | -2557 to +124      |
| A02        | 1 kb    | +13970 to +14954   |
| A03        | 0.9 kb  | -2456 to -1549     |
| A04        | 1.1 kb  | +5835 to +6935     |
| A05        | 1.6 kb  | +15439 to +17086   |
| A06        | 1.6 kb  | +24467 to +26098   |
| GCG 5' UTR | 0.25 kb | -19 to +247        |

\* Nucleotide positions relative to transcription start site, sequence ID in methods

**Table S3. Efficiency of labeling of  $\alpha$  cells with Lenti-CMV-H2BmCherry**

| Donor   | % mCherry <sup>+</sup> $\alpha$ cells |
|---------|---------------------------------------|
| Donor 3 | 34                                    |
| Donor 5 | 28                                    |
| Donor 7 | 32                                    |
| Donor 8 | 11                                    |

**Table S4. In vitro specificity of candidate reporters for  $\alpha$  cells**

| Region | Total mCherry <sup>+</sup> cells | % GCG <sup>+</sup> | %PDX1 <sup>+</sup> |
|--------|----------------------------------|--------------------|--------------------|
| CMV    | 411                              | 19                 | 59                 |
| RIP    | 536                              | 3                  | 99.6               |
| rGcg   | 492                              | 35                 | 72                 |
| G01    | 83                               | 29                 | 69                 |
| G02    | 295                              | 28                 | 79                 |
| G03    | 2                                | 0                  | 100                |
| G04    | 109                              | 40                 | 54                 |
| G05    | 304                              | 36                 | 57                 |
| G06    | 4                                | 75                 | 25                 |
| G07    | 46                               | 7                  | 100                |
| G08    | 50                               | 58                 | 70                 |
| G09    | 10                               | 80                 | 30                 |
| GUTR   | 96                               | 86                 | 22                 |
| A01    | 313                              | 45                 | 69                 |
| A02    | 3                                | 33                 | 100                |
| A03    | 3                                | 33                 | 100                |
| A04    | 129                              | 27                 | 91                 |
| A05    | 0                                | 0                  | 0                  |
| A06    | 2                                | 50                 | 100                |

\*Percentages may add to more than 100% because of occasional coexpression of PDX1 and GCG during in vitro culture (see text).
